# Supplementary material for: TREM-like transcript-1 protects against inflammation-associated hemorrhage by facilitating platelet aggregation in mice and humans
Source: JCI journal article supplement (doi:10.1172/jci36175), 2009-05-13
Supplement: sd1 [file 1]

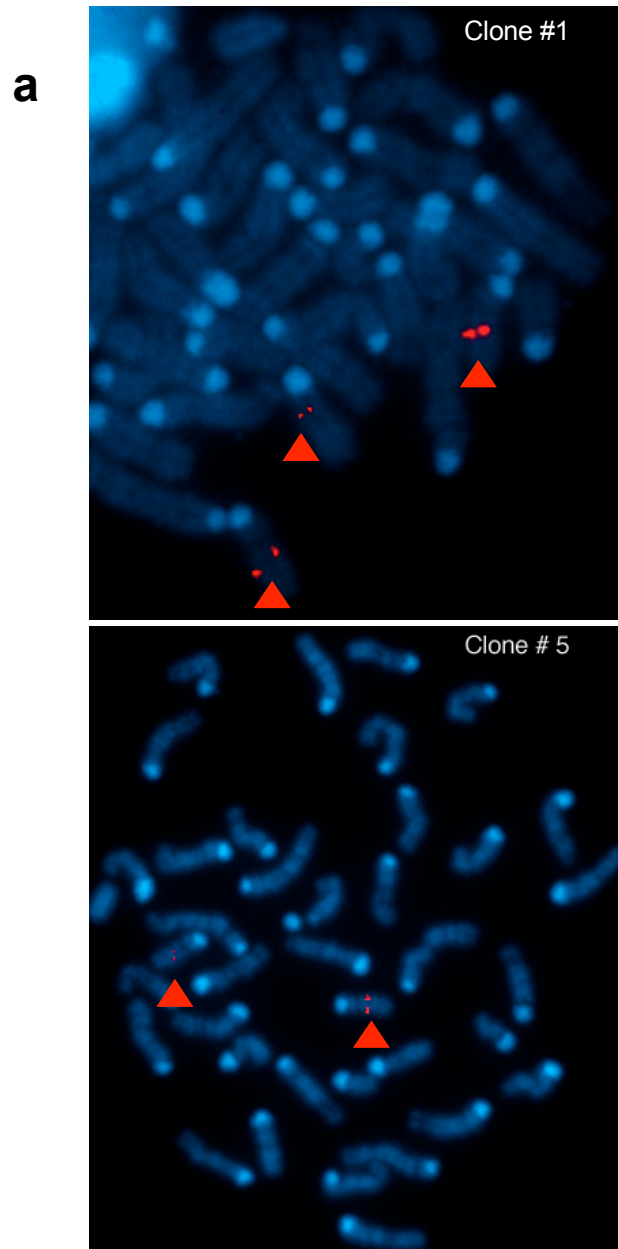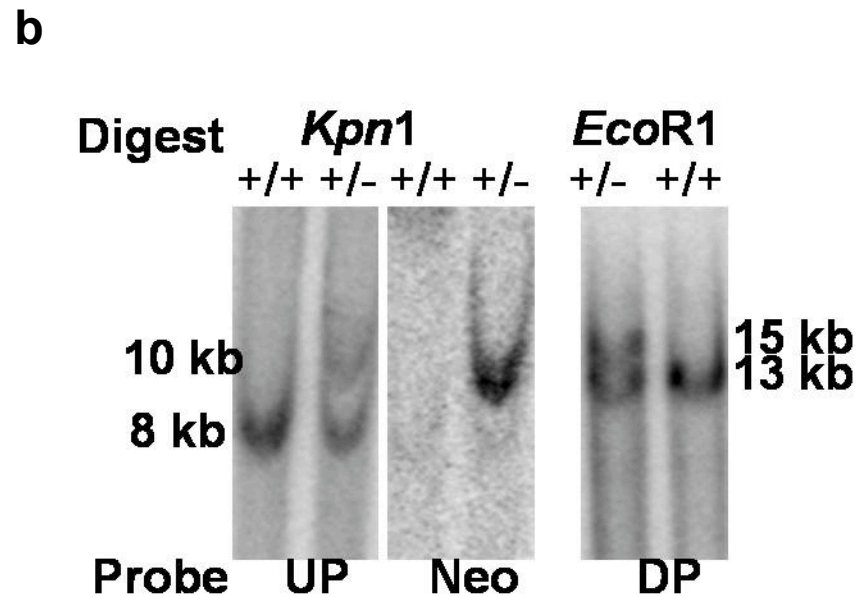

**Supplemental Figure 1: Construction of the TLT-1<sup>-/-</sup> null mouse -**  
 (a) Fluorescent *in situ* hybridization of ES cell clones using the whole BAC as a probe. Arrows are just below the chromosomes that demonstrated probe hybridization. Clone 1 (top) demonstrated three regions of hybridization and clone 5 (bottom) demonstrated only two. Clone 5 was ultimately chosen for further studies. (b) Southern analysis of *Kpn1* and *EcoR1* digested genomic DNA from a representative ES cell clone. The *Kpn1* digest is probed with the upstream probe (UP) and the neo-cassette and the *EcoR1* digest is probed with the downstream probe (DP).

**Supplementary Table 1: Characteristics of the Initial Study Population**

| <b>Parameter</b>                   | <b>Value</b>  |
|------------------------------------|---------------|
| Age                                | 49.5 ± 14.6   |
| Sex, Male (%)                      | 77%           |
| SOFA Score                         | 2.6 ± 1.9     |
| APACHE II Score                    | 10.5 ± 4.7    |
| Length of Hospital Stay (Days)     | 14.5 ± 10.7   |
| Length of Stay in ICU (days)       | 1.5 ± 3.2     |
| Death                              | 0.1 ± 0.3     |
| Temperature                        | 37.6 ± 1.0    |
| PaO <sub>2</sub> :FiO <sub>2</sub> | 315.5 ± 69.3  |
| WBC                                | 20.1 ± 11.7   |
| Platelets x1000/ml                 | 299.6 ± 142.4 |
| sTLT-1 µg/ml                       | 328.8 ± 76.06 |

**Patients with sepsis have increased levels of soluble TLT-1.** Values are means ±SD, PaO<sub>2</sub>:FO<sub>2</sub> denotes the ratio of the partial pressure of arterial oxygen to the fraction of inspired oxygen, sTLT-1 – soluble Trem-like transcript-1. The Sepsis-related Organ Failure Assessment (SOFA) score can range from 0-24, with higher scores indicating more abnormal organ function. The Acute Physiology and Chronic Evaluation II (APACHE II) score can range from 0- 71 with the higher scores indicating more abnormal organ function.

**Supplemental Table 2:** Clinical and Biological Parameters at Admission from a Longitudinal Study of sTLT-1 in Sepsis.

| <b>Parameter</b>                         | <b>Overall<br/>(n=46)</b> | <b>Survivors<br/>(n=24)</b> | <b>Non<br/>Survivors<br/>(n=22)</b> | <b>P<br/>value</b> |
|------------------------------------------|---------------------------|-----------------------------|-------------------------------------|--------------------|
| Age, mean (SD) yrs                       | 62 (17)                   | 59 (20)                     | 65 (12)                             | 0.15               |
| Sex, male (%)                            | 66                        | 71                          | 64                                  | 0.41               |
| SAPSI, mean (SD)                         | 65 (19)                   | 65 (22)                     | 66 (18)                             | 0.93               |
| SOFA score,<br>median (IQR)              | 13 (12-15)                | 13 (12-15)                  | 13 (11-16)                          | 0.55               |
| Corticosteroids (%)                      | 74                        | 75                          | 73                                  | 0.47               |
| rhaPC (%)                                | 15                        | 20                          | 9                                   | 0.12               |
| Bacteremia (%)                           | 26                        | 29                          | 23                                  | 0.55               |
| Lactate, median<br>(IQR) mmol/L          | 3.1 (1.8-4.6)             | 2.8 (1.7-4.2)               | 3.6 (2.1-4.9)                       | 0.22               |
| Procalcitonin,<br>median (IQR) ng/mL     | 12.4 (3.5-<br>40.2)       | 12.8 (3.8-<br>111.6)        | 12.6 (3.4-38.4)                     | 0.50               |
| C-Reactive Protein,<br>median (IQR) mg/L | 164 (87-251)              | 144 (65-222)                | 158 (115-274)                       | 0.32               |
| sTLT-1, median<br>(IQR) µg/mL            | 36.6 (16.5-<br>79.8)      | 36.1 (19.8-<br>69.7)        | 37.1 (11.3-<br>104.3)               | 0.83               |

**Supplemental Table 3** : Microorganism distribution in the Longitudinal Study of sTLT-1 in Sepsis.\*

| <b>Microorganism</b>          | <b>Overall (n=46)</b> | <b>Survivors (n=24)</b> | <b>Non Survivors (n=22)</b> | <b>P value</b> |
|-------------------------------|-----------------------|-------------------------|-----------------------------|----------------|
| <b>Bacilli, n (%)</b>         |                       |                         |                             |                |
| <b>Escherichia coli</b>       | 8 (17)                | 5 (21)                  | 3 (14)                      | 0.18           |
| <b>Haemophilus species</b>    | 3 (6)                 | 2 (8)                   | 1 (5)                       | 0.29           |
| <b>Pseudomonas aeruginosa</b> | 1 (2)                 |                         | 1 (5)                       | 0.12           |
| <b>Cocci, n (%)</b>           |                       |                         |                             |                |
| <b>Streptococcus species</b>  | 15 (33)               | 8 (33)                  | 7 (32)                      | 0.85           |
| <b>Staphylococcus species</b> | 3 (6)                 | 2 (8)                   | 1 (5)                       | 0.29           |
| <b>Enterococcus species</b>   | 2 (4)                 | 1 (4)                   | 1 (5)                       | 0.62           |
| <b>Unknown</b>                | 14 (30)               | 6 (25)                  | 8 (36)                      | 0.16           |

\* Due to rounding, percentages do not add up to 100.
